# Supplementary material for: Complete Genome Sequence of Photobacterium damselae Subsp. damselae Strain SSPD1601 Isolated from Deep-Sea Cage-Cultured Sebastes schlegelii with Septic Skin Ulcer
Source: Int J Genomics. 2019 Apr 10;2019:4242653. doi: 10.1155/2019/4242653 (PMC6481104; doi:10.1155/2019/4242653)
Supplement: Supplementary Materials — Table S1: virulence factors identified in the genome of PDD strain SSPD1601 according to the Virulence Factors of Bacterial Pathogens database (VFDB). [file 4242653.f1.xlsx]

## Sheet: SSPD1601.VFDB.blast
Virulence factors identified in the genome of PDD strain SSPD1601 according to the virulence factors of pathogenic bacteria database (VFDB)
Chromosomes I
Query_id	Subject_id	Identity	Align_length	Miss_match	Gap	Query_start	Query_end	Subject_start	Subject_end	E_value	Score	Description
SSPD1601_0148	VFG0332	82.91	117	20	0	1	117	1	117	2e-13	73.8	rfaD - ADP-L-glycero-D-mannoheptose-6-epimerase [Haemophilus influenzae Rd] (VF0044)
SSPD1601_0383	VFG0111	85.48	62	9	0	1	62	1	62	3e-07	52	pilA - type 4 fimbrial precursor PilA [Pseudomonas aeruginosa PAO1] (VF0082)
SSPD1601_0487	VFG0477	79.28	251	52	0	280	530	280	530	4e-17	85.7	rpoS - sigma S (sigma 38) factor of RNA polymerase, major sigmafactor during stationary phase [Salmonella enterica (serovar typhimurium) LT2] (VF0112)
SSPD1601_0487	VFG1866	80.56	144	28	0	391	534	484	627	2e-10	63.9	rpoS - stationary phase specific sigma factor RpoS [Legionella pneumophila Philadelphia 1] (VF0166)
SSPD1601_0487	VFG1866	90.24	41	4	0	166	206	259	299	2e-06	50.1	rpoS - stationary phase specific sigma factor RpoS [Legionella pneumophila Philadelphia 1] (VF0166)
SSPD1601_0489	VFG0562	88.24	68	8	0	1567	1634	1477	1544	2e-12	71.9	mutS - methyl-directed mismatch repair, recognize exocyclic adducts of guanosine [Salmonella enterica (serovar typhimurium) LT2]
SSPD1601_0489	VFG0562	85.48	62	9	0	1915	1976	1825	1886	2e-06	52	mutS - methyl-directed mismatch repair, recognize exocyclic adducts of guanosine [Salmonella enterica (serovar typhimurium) LT2]
SSPD1601_0522	VFG0079	89.36	47	5	0	595	641	598	644	4e-07	54	clpC - endopeptidase Clp ATP-binding chain C [Listeria monocytogenes (serovar 1/2a) EGD-e] (VF0072)
SSPD1601_0522	VFG0079	84	75	12	0	2029	2103	1846	1920	4e-07	54	clpC - endopeptidase Clp ATP-binding chain C [Listeria monocytogenes (serovar 1/2a) EGD-e] (VF0072)
SSPD1601_0765	VFG1300	96.55	29	1	0	1438	1466	1432	1460	4e-06	50.1	cap8D - capsular polysaccharide synthesis enzyme Cap8D [Staphylococcus aureus MW2] (VF0003)
SSPD1601_0942	VFG0079	94.29	35	2	0	1090	1124	1846	1880	3e-07	54	clpC - endopeptidase Clp ATP-binding chain C [Listeria monocytogenes (serovar 1/2a) EGD-e] (VF0072)
SSPD1601_0942	VFG0079	94.12	34	2	0	579	612	1155	1188	1e-06	52	clpC - endopeptidase Clp ATP-binding chain C [Listeria monocytogenes (serovar 1/2a) EGD-e] (VF0072)
SSPD1601_1286	VFG1888	85.51	69	10	0	519	587	891	959	2e-08	58	letS - sensory box histidine kinase/response regulator [Legionella pneumophila Philadelphia 1] (VF0262)
SSPD1601_1352	VFG1861	84.21	76	12	0	1148	1223	1208	1283	8e-08	56	katA - catalase/(hydro)peroxidase [Legionella pneumophila Philadelphia 1] (VF0168)
SSPD1601_1503	VFG2088	85.37	164	24	0	307	470	406	569	2e-31	135	vasK - IcmF-related protein [Vibrio cholerae N16961] (VF0335)
SSPD1601_1503	VFG2088	85.44	103	15	0	623	725	722	824	1e-16	85.7	vasK - IcmF-related protein [Vibrio cholerae N16961] (VF0335)
SSPD1601_1503	VFG2088	87.72	57	7	0	2713	2769	2812	2868	3e-08	58	vasK - IcmF-related protein [Vibrio cholerae N16961] (VF0335)
SSPD1601_1503	VFG2088	80.7	114	22	0	1009	1122	1108	1221	2e-06	52	vasK - IcmF-related protein [Vibrio cholerae N16961] (VF0335)
SSPD1601_1507	VFG2084	80.61	263	51	0	1909	2171	1912	2174	3e-26	117	clpB - clpB protein [Vibrio cholerae N16961] (VF0335)
SSPD1601_1507	VFG2084	77.61	393	88	0	867	1259	867	1259	2e-15	81.8	clpB - clpB protein [Vibrio cholerae N16961] (VF0335)
SSPD1601_1509	VFG2082	88.64	44	5	0	136	179	676	719	7e-06	48.1	VCA0114 - hypothetical protein [Vibrio cholerae N16961] (VF0335)
SSPD1601_1513	VFG2079	84.27	89	14	0	457	545	526	614	4e-11	65.9	VCA0111 - hypothetical protein [Vibrio cholerae N16961] (VF0335)
SSPD1601_1516	VFG2093	79.69	640	130	0	744	1383	813	1452	7e-63	238	VCA0108 - hypothetical protein [Vibrio cholerae N16961] (VF0335)
SSPD1601_1701	VFG1866	96.43	28	1	0	271	298	517	544	8e-06	48.1	rpoS - stationary phase specific sigma factor RpoS [Legionella pneumophila Philadelphia 1] (VF0166)
SSPD1601_1848	VFG1109	83.56	73	12	0	391	463	391	463	2e-06	50.1	nanA - N-acetylneuraminate lyase, putative [Vibrio cholerae N16961]
SSPD1601_1928	VFG0478	84.78	92	14	0	142	233	142	233	3e-13	71.9	fur - transcriptional repressor of iron-responsive genes (Fur family) (ferric uptake regulator) [Salmonella enterica (serovar typhimurium) LT2] (VF0113)
SSPD1601_2020	VFG2012	96.97	33	1	0	571	603	553	585	2e-08	58	flhA - flagellar biosynthetic protein FlhA [Legionella pneumophila Philadelphia 1] (VF0157)
SSPD1601_2020	VFG2126	92.68	41	3	0	469	509	469	509	2e-08	58	lcrD - Low Calcium Response D [Chlamydia trachomatis D/UW-3/CX] (VF0344)
SSPD1601_2020	VFG1916	89.36	47	5	0	472	518	487	533	3e-07	54	flhA - flagellar biosynthesis protein [Campylobacter jejuni NCTC 11168] (VF0114)
SSPD1601_2020	VFG2356	92.11	38	3	0	478	515	478	515	1e-06	52	flhA - flagellar biosynthesis protein FlhA [Yersinia enterocolitica 8081] (VF0394)
SSPD1601_2020	VFG2356	89.13	46	5	0	569	614	569	614	1e-06	52	flhA - flagellar biosynthesis protein FlhA [Yersinia enterocolitica 8081] (VF0394)
SSPD1601_2024	VFG2016	79.9	199	40	0	556	754	508	706	8e-15	77.8	fliP - flagellar biosynthetic protein FliP [Legionella pneumophila Philadelphia 1] (VF0157)
SSPD1601_2031	VFG2331	90.38	52	5	0	560	611	575	626	2e-10	63.9	fliI - flagellum-specific ATP synthase [Yersinia enterocolitica 8081] (VF0394)
SSPD1601_2054	VFG1992	90.7	43	4	0	313	355	316	358	6e-08	54	flgC - flagellar basal body rod protein FlgC [Legionella pneumophila Philadelphia 1] (VF0157)
SSPD1601_2257	VFG1122	78.03	396	87	0	93	488	339	734	2e-20	95.6	VC1789 - transposase OrfAB, subunit B [Vibrio cholerae N16961]
SSPD1601_2258	VFG1123	83.33	306	51	0	1	306	37	342	8e-53	202	VC1790 - transposase OrfAB, subunit A [Vibrio cholerae N16961]
SSPD1601_2258	VFG1485	88.14	59	7	0	250	308	241	299	2e-10	61.9	l7045 - L7045 [Escherichia coli 536]
SSPD1601_2345	VFG1668	83.17	101	17	0	712	812	724	824	6e-11	65.9	orf45 - putative lysil-tRNA synthetase LysU [Escherichia coli 536]
SSPD1601_2439	VFG0331	87.5	72	9	0	556	627	544	615	9e-13	71.9	rfaE - ADP-heptose synthase [Haemophilus influenzae Rd] (VF0044)
SSPD1601_2439	VFG0331	90.91	44	4	0	1027	1070	1015	1058	6e-08	56	rfaE - ADP-heptose synthase [Haemophilus influenzae Rd] (VF0044)
SSPD1601_2458	VFG0479	81.84	358	63	2	550	906	631	987	5e-45	178	pykF - pyruvate kinase I (formerly F), fructose stimulated [Salmonella enterica (serovar typhimurium) LT2]
SSPD1601_2581	VFG1855	85.51	214	31	0	1040	1253	1043	1256	6e-45	178	htpB - Hsp60, 60K heat shock protein HtpB [Legionella pneumophila Philadelphia 1] (VF0159)
SSPD1601_2581	VFG1855	84.5	129	20	0	732	860	735	863	2e-20	97.6	htpB - Hsp60, 60K heat shock protein HtpB [Legionella pneumophila Philadelphia 1] (VF0159)
SSPD1601_2581	VFG1855	86.59	82	11	0	1423	1504	1426	1507	7e-14	75.8	htpB - Hsp60, 60K heat shock protein HtpB [Legionella pneumophila Philadelphia 1] (VF0159)
SSPD1601_2581	VFG1855	91.07	56	5	0	568	623	571	626	1e-12	71.9	htpB - Hsp60, 60K heat shock protein HtpB [Legionella pneumophila Philadelphia 1] (VF0159)
SSPD1601_2581	VFG1855	93.75	48	3	0	1597	1644	1606	1653	1e-12	71.9	htpB - Hsp60, 60K heat shock protein HtpB [Legionella pneumophila Philadelphia 1] (VF0159)
SSPD1601_2581	VFG1855	79.53	171	35	0	202	372	205	375	1e-09	61.9	htpB - Hsp60, 60K heat shock protein HtpB [Legionella pneumophila Philadelphia 1] (VF0159)
Chromosomes II
Query_id	Subject_id	Identity	Align_length	Miss_match	Gap	Query_start	Query_end	Subject_start	Subject_end	E_value	Score	Description
SSPD1601_0098	VFG2016	100	25	0	0	45	69	12	36	2e-06	50.1	fliP - flagellar biosynthetic protein FliP [Legionella pneumophila Philadelphia 1] (VF0157)
SSPD1601_0451	VFG2091	94.44	36	2	0	343	378	367	402	8e-08	56	vgrG-3 - vgrG protein [Vibrio cholerae N16961] (VF0335)
SSPD1601_0728	VFG1107	86.79	53	7	0	877	929	880	932	3e-06	50.1	VC1774 - conserved hypothetical protein [Vibrio cholerae N16961]
